# Supplementary material for: Antimicrobial Activity of Diffusible and Volatile Metabolites Emitted by Beauveria bassiana: Chemical Profile of Volatile Organic Compounds (VOCs) Using SPME-GC/MS Analysis
Source: MDPI journal article supplement (doi:10.3390/plants12152854), 2023-08-03
Supplement: s1 [file s1]

## Supplementary Materials

# Antimicrobial Activity of Diffusible and Volatile Metabolites Emitted by *Beauveria bassiana*: Chemical Profile of Volatile Organic Compounds (VOCs) Using SPME-GC/MS Analysis

Ippolito Camele <sup>1,\*</sup>, Sadeek A. Sadeek <sup>2</sup>, Rocco Racioppi <sup>3</sup> and Hazem S. Elshafie <sup>1,\*</sup>

<sup>1</sup> School of Agricultural, Forestry, Food and Environmental Sciences, University of Basilicata, Viale dell'Ateneo Lucano 10, 85100 Potenza, Italy

<sup>2</sup> Department of Chemistry, Faculty of Science, University of Zagazig, 44519 Zagazig, Egypt; s\_sadeek@zu.edu.eg

<sup>3</sup> Department of Sciences, University of Basilicata, Viale dell'Ateneo Lucano 10, 85100 Potenza, Italy; rocco.racioppi@unibas.it

\* Correspondence: ippolito.camele@unibas.it (I.C.); hazem.elshafie@unibas.it (H.S.E.); Tel.: +39-0971205544 (I.C.); +39-0971205498 (H.S.E.); Fax: +39-0971205503 (H.S.E.)

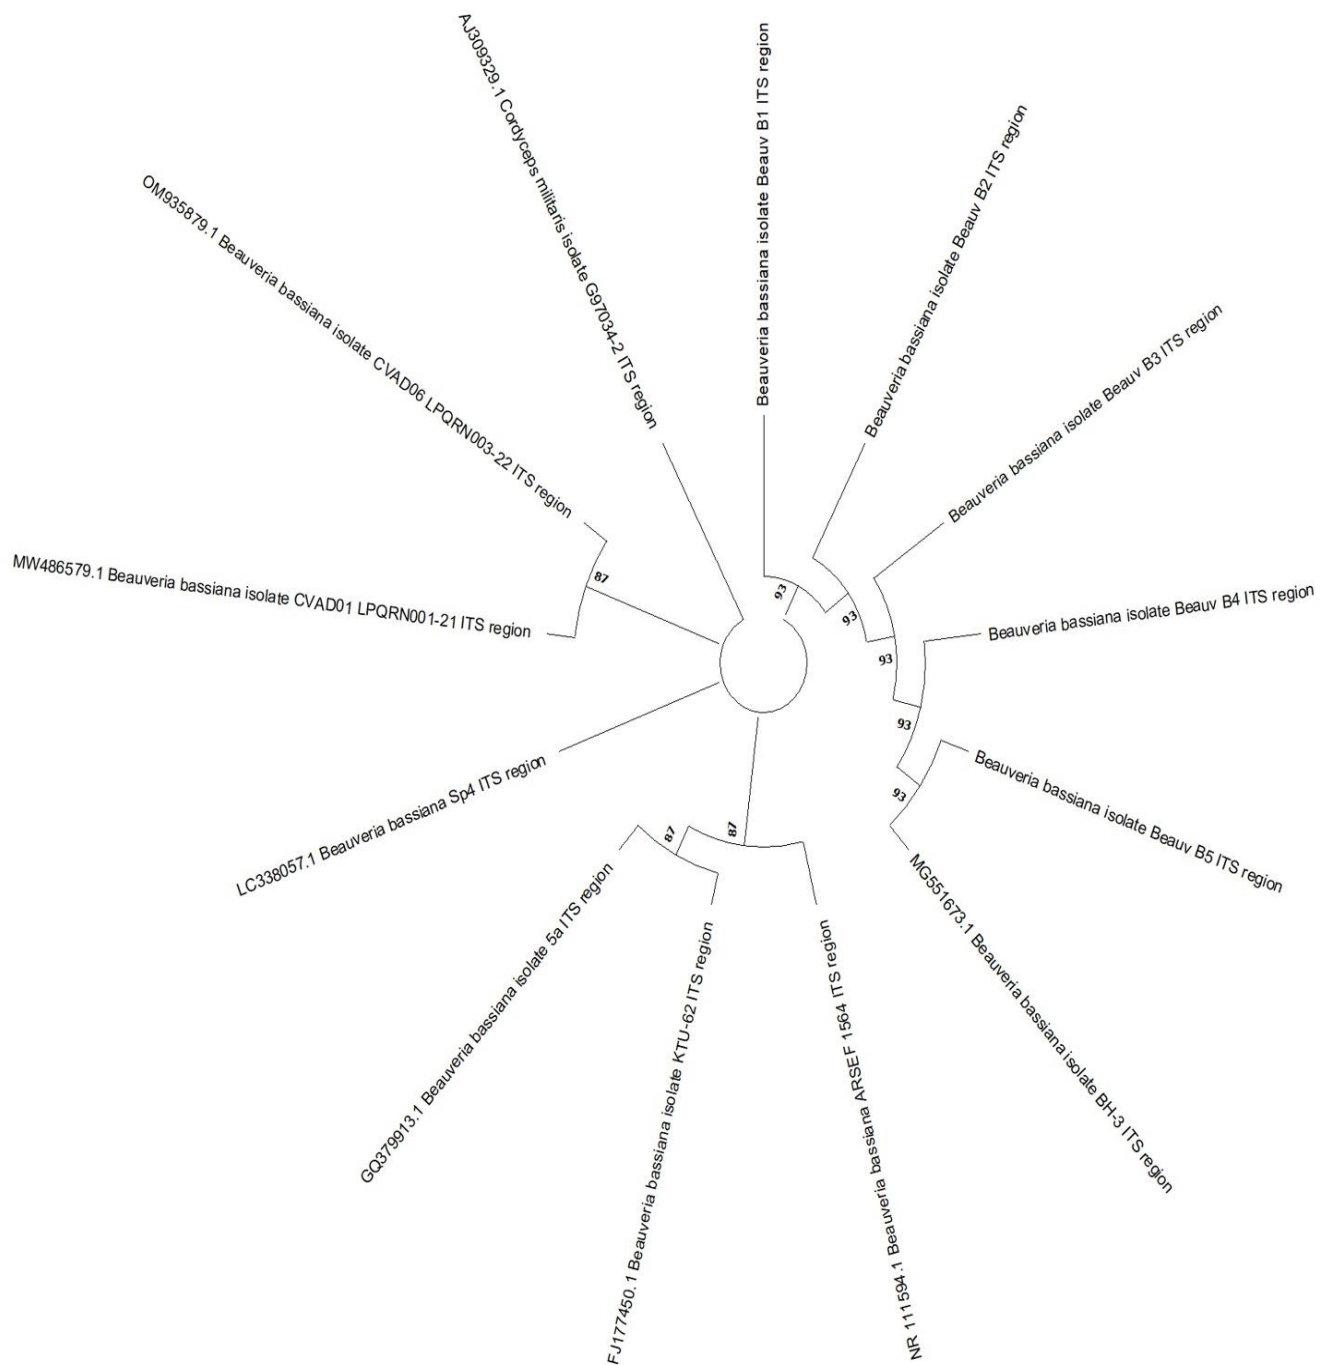

**Figure S1.** Evolutionary relationships of *Beauveria bassiana* and related species nucleotide sequences based on ITS region (567 bp).

The evolutionary history was inferred using the UPGMA method. The optimal tree is shown. The evolutionary distances were computed using the Maximum Composite Likelihood method and are in the units of the number of base substitutions per site. The analysis involved 13 nucleotide sequences Codon positions included were



1st+2nd+3rd+Noncoding. All ambiguous positions were removed for each sequence pair (pairwise deletion option). Evolutionary analyses were conducted in MEGA11.

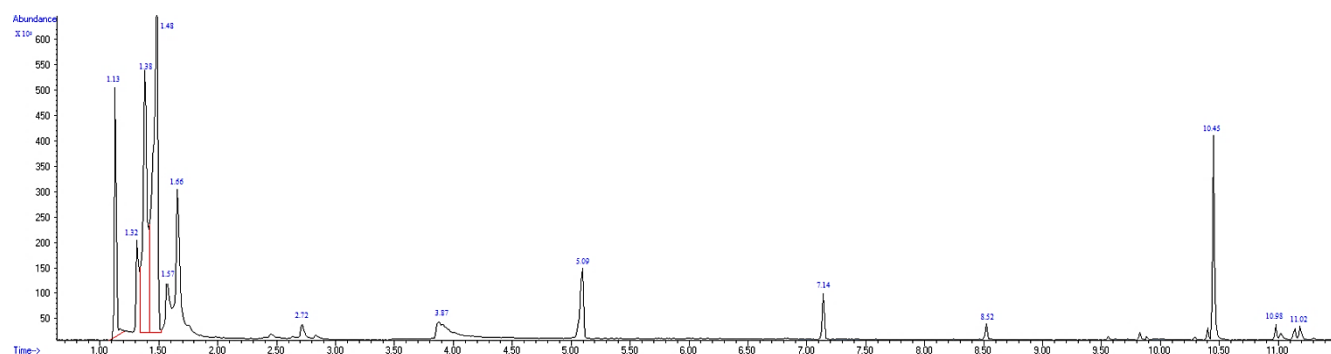

**Figure S3.** Chromatogram of VOCs extracted from *B. bassiana* UniB2439-3

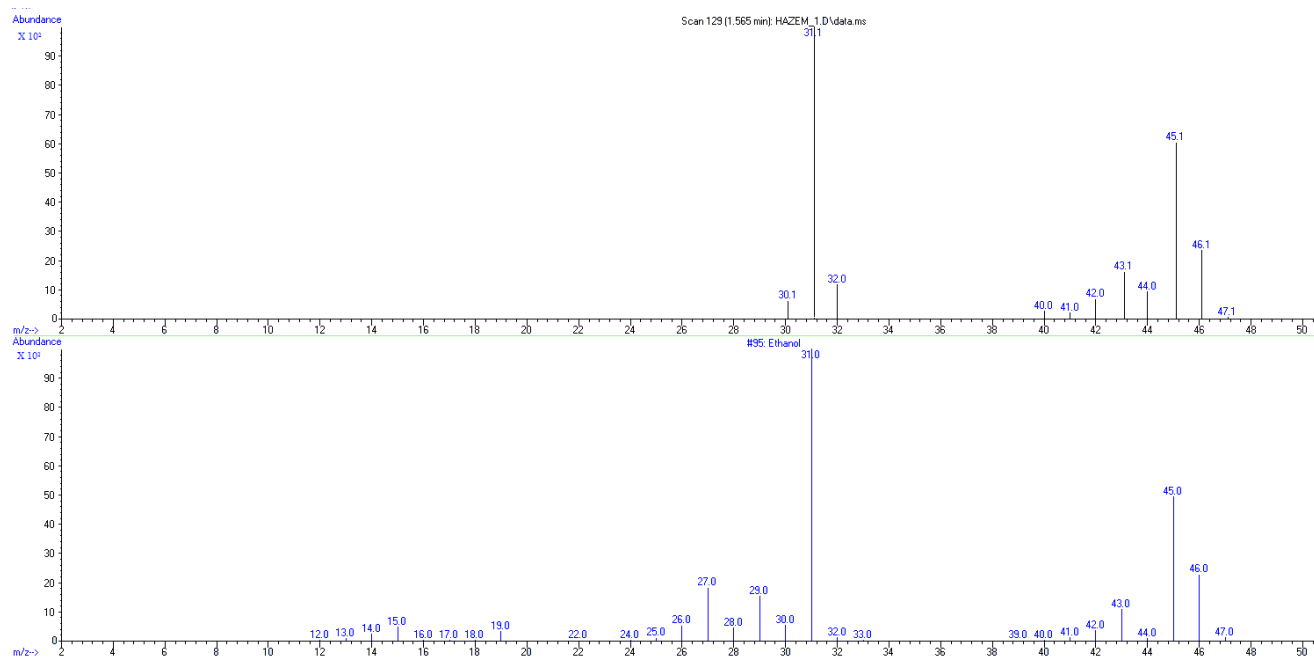

**Figure S4.** Mass spectra of ethanol

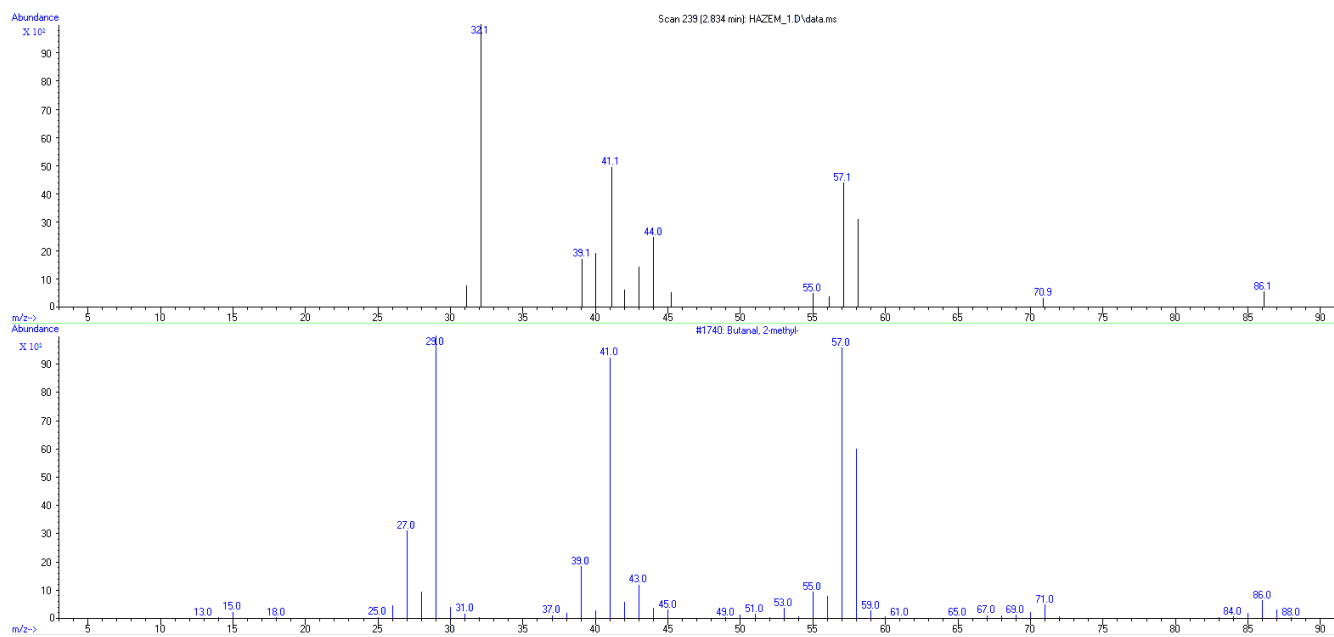

**Figure S5.** Mass spectra of Butanal, 2-methyl

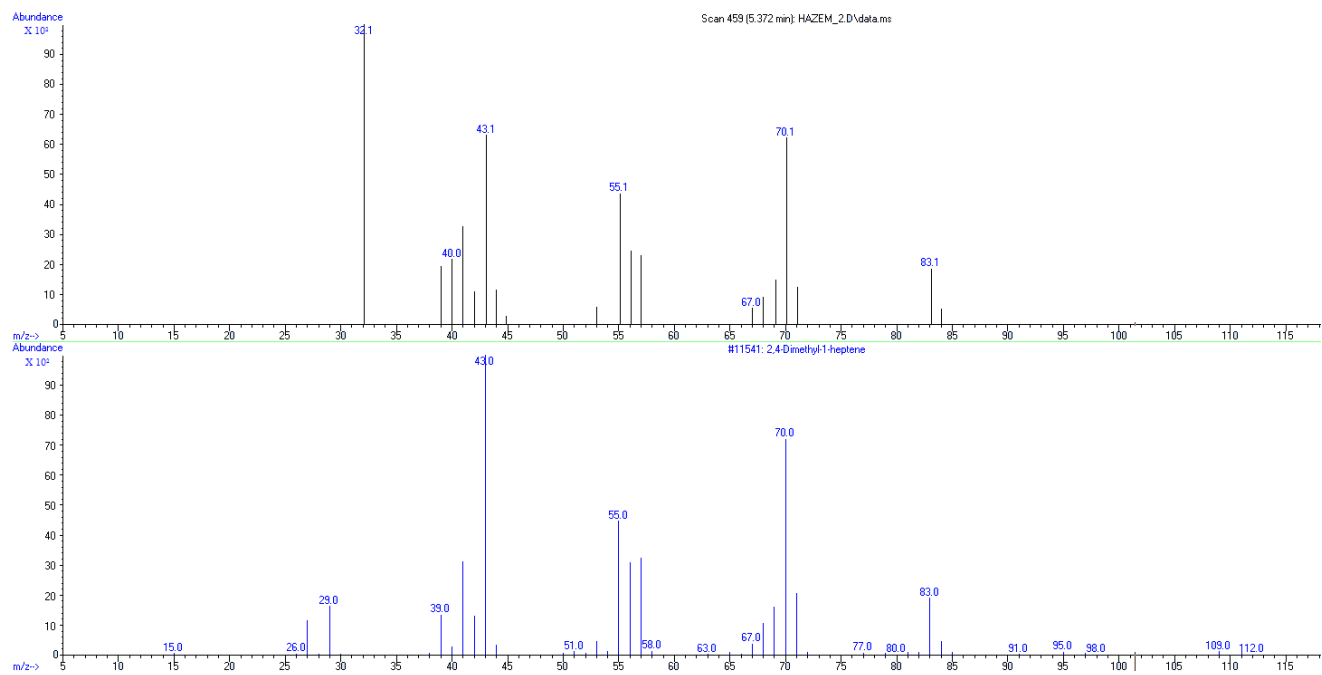

**Figure S6.** Mass spectra of 2,4-Dimethyl-1-heptene

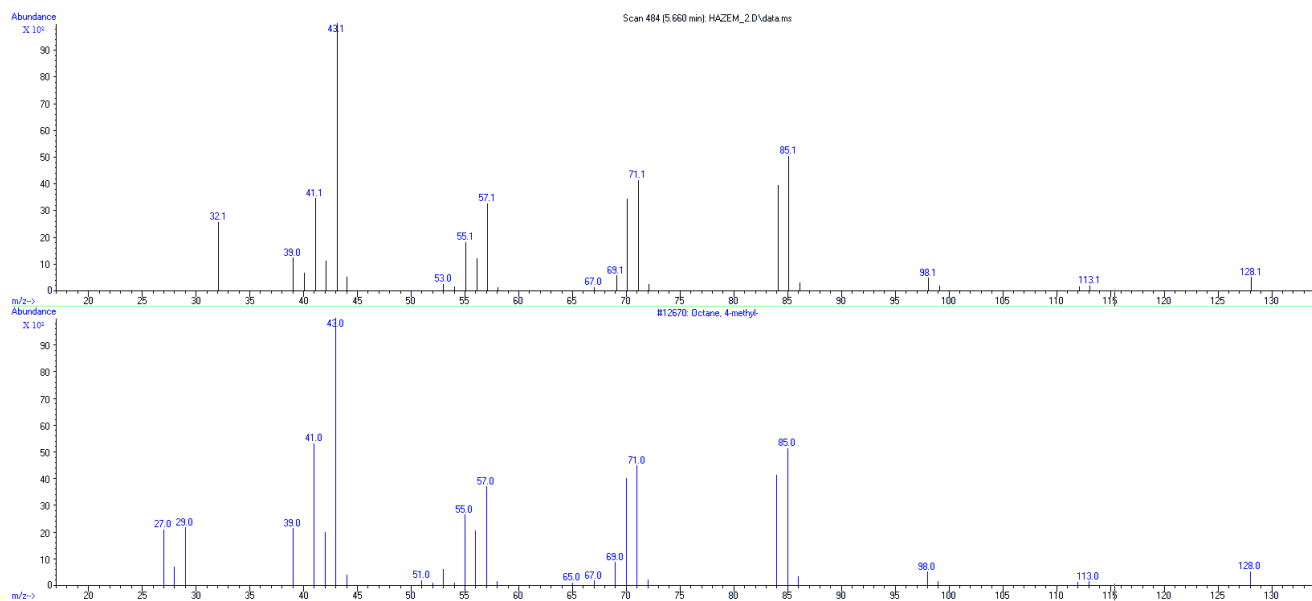

**Figure S7.** Mass spectra of Octane, 4-methyl



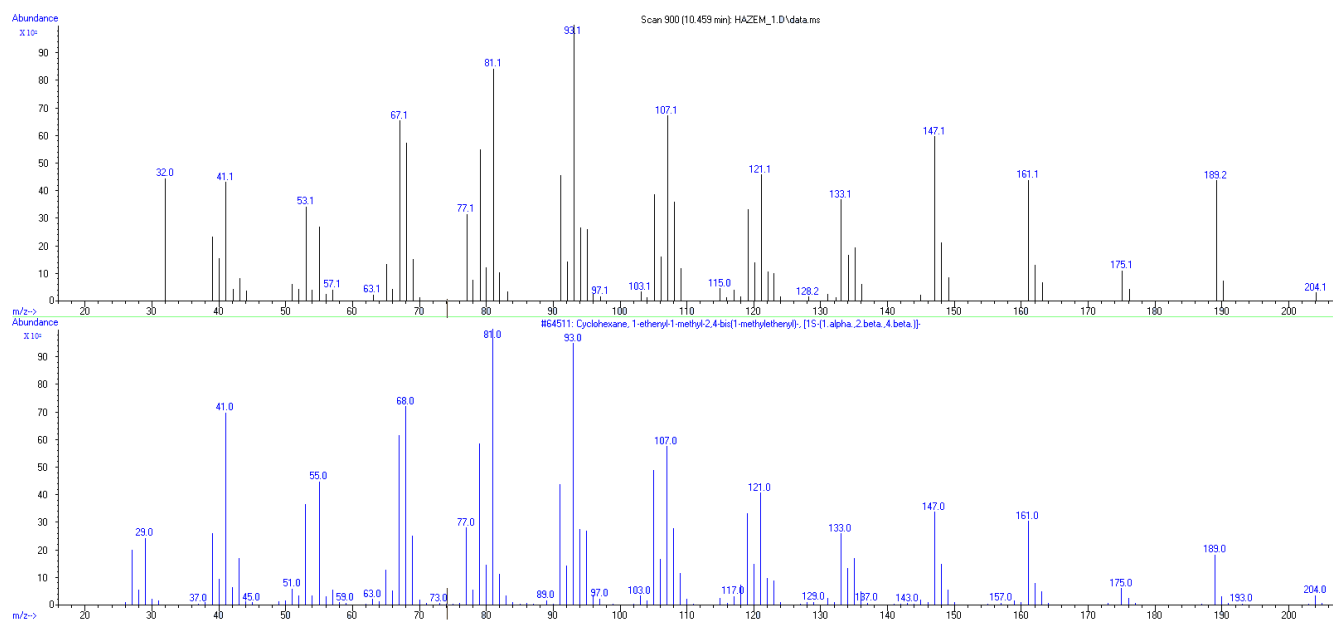

Figure S8. Mass spectra of  $\beta$ -elemene

**Table S1.** Antagonistic antibacterial activity of the five studied isolates of *Beauveria* sp.

|      |                         | Diameter of inhibition zone (mm) |            |            |            |            |
|------|-------------------------|----------------------------------|------------|------------|------------|------------|
|      |                         | UniB2439-1                       | UniB2439-2 | UniB2439-3 | UniB2439-4 | UniB2439-5 |
| G+ve | <i>B. cereus</i>        | 10±1.2bc                         | 12±0.8b    | 20±1.4a    | 15±1.5b    | 8±0.8c     |
|      | <i>B. megaterium</i>    | 8±1.4c                           | 7±0.9c     | 15±3.2a    | 11±1.2b    | 10±2.4b    |
|      | <i>B. mojavensis</i>    | 12±0.2b                          | 15±0.8b    | 22±2.4a    | 12±2.4bc   | 10±2.1bc   |
|      | <i>C. michiganensis</i> | 10±3.2b                          | 10±0.7b    | 19±1.4a    | 8±1.2c     | 7±1.2c     |
| G-ve | <i>X. campestris</i>    | 7±1.2b                           | 5±0.7b     | 10±2.2a    | 0±0.2c     | 5±0.7b     |
|      | <i>X. vesicatoria</i>   | 5±2.3c                           | 10±2.2ab   | 12±3.2a    | 8±0.7ab    | 6±0.8b     |
|      | <i>P. aeruginosa</i>    | 0±0c                             | 3±1.2ab    | 0±0c       | 5±1.2a     | 0±0c       |
|      | <i>P. fluorescens</i>   | 2±1.2b                           | 8±0.8a     | 6±0.8ab    | 0±0c       | 0±0c       |

Values followed by different letters in each horizontal row for each tested bacteria are significantly different at  $P < 0.05$  according to one-way ANOVA combined with *Tukey* B post hoc test by using SPSS program. Data are expressed as the mean of inhibition zone diameter (mm) for three
